# Supplementary material for: Synthesis of Celecoxib-Eutectic Mixture Particles via Supercritical CO2 Process and Celecoxib Immediate Release Tablet Formulation by Quality by Design Approach
Source: MDPI journal article supplement (doi:10.3390/pharmaceutics14081549), 2022-07-26
Supplement: s1 [file s1]

## Supplementary Materials:

# Synthesis of Celecoxib-Eutectic Mixture Particles via Supercritical CO<sub>2</sub> Process and Celecoxib Immediate Release Tablet Formulation by Quality by Design Approach

Seung-Hyeon Hong <sup>1,2,†</sup>, Linh Dinh <sup>1,2,†</sup>, Sharif Md Abuzar <sup>1,2</sup>, Eun Seok Lee <sup>1,2</sup> and Sung-Joo Hwang <sup>1,2,\*</sup>

<sup>1</sup> College of Pharmacy, Yonsei University, 85 Songdogwahak-ro, Yeonsu-gu, Incheon 21983, Korea; shhongmartin@naver.com (S.-H.H.); dinhkhanhlinh@yonsei.ac.kr (L.D.); sumonzar@gmail.com (S.M.A.); leslech@naver.com (E.S.L.)

<sup>2</sup> Yonsei Institute of Pharmaceutical Sciences, Yonsei University, 85 Songdogwahak-ro, Yeonsu-gu, Incheon 21983, Korea

\* Correspondence: sjh11@yonsei.ac.kr; Tel.: +82-32-7494518

† These authors contributed equally to this work.

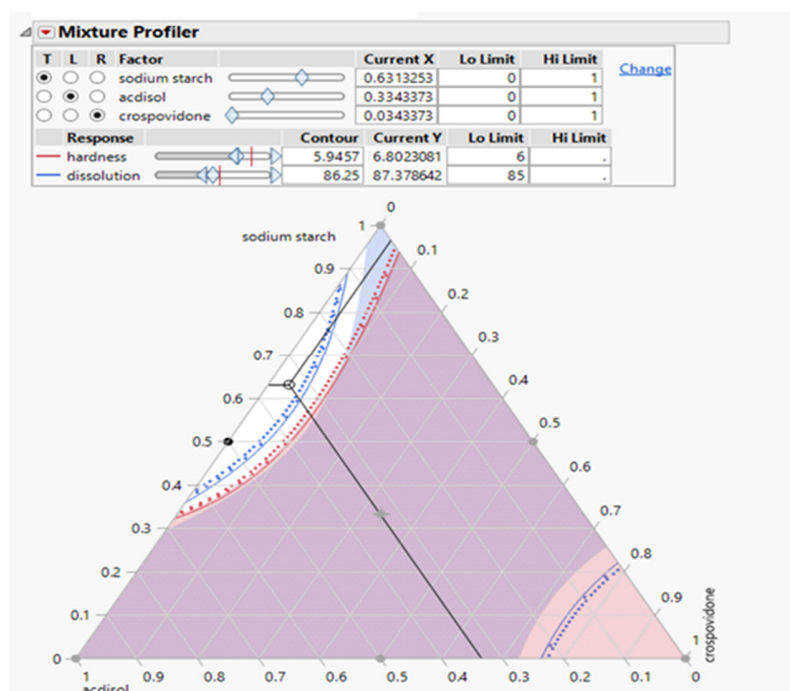

**Figure S1.** DoE result of the ratio of sodium starch glycolate, cross-linked carboxyl methyl cellulose sodium (Ac-Di-Sol®) and cross-linked povidone in CEL-ADI EM IR tablet analyzed by JMP® software.

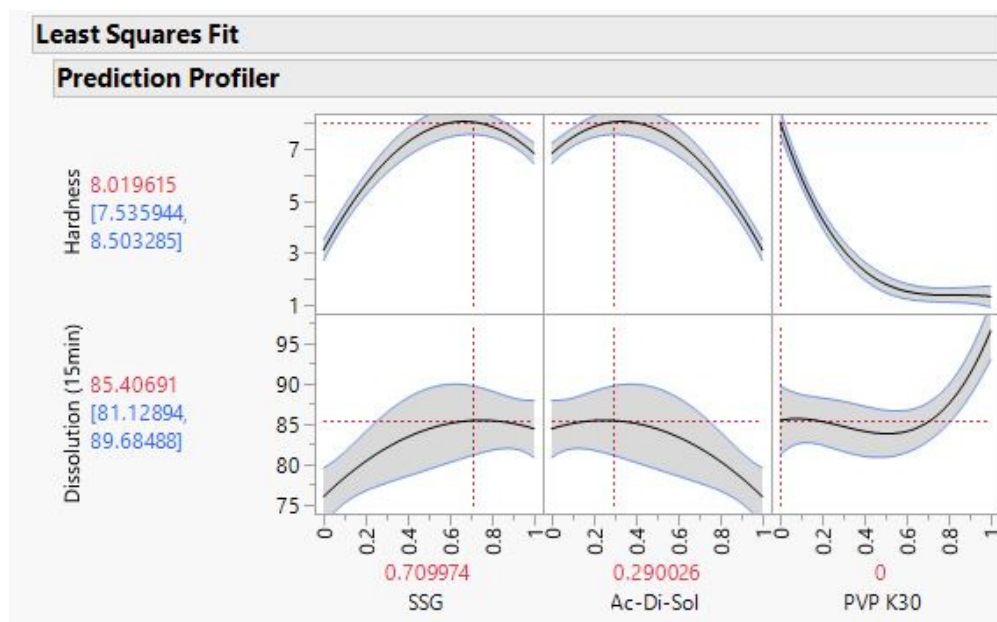

**Figure S2.** DoE result of the ratio of sodium starch glycolate, cross-linked carboxyl methyl cellulose sodium (Ac-Di-Sol®) and cross-linked povidone in CEL-ADI EM IR tablet, responses predicted by JMP® software.
